# Supplementary material for: Development ofβ-Lactamase as a Tool for Monitoring Conditional Gene Expression by a Tetracycline-Riboswitch inMethanosarcina acetivorans
Source: Hindawi journal article supplement (doi:10.1155/2014/725610), 2014-01-01
Supplement: f1 [file 725610.f1.pdf]

## Electronic Supplementary Material

### Development of $\beta$ -lactamase as a tool for monitoring conditional gene expression by a tetracycline-riboswitch in *Methanosarcina acetivorans*

Shemsi Demolli<sup>1</sup>, Miriam M. Geist<sup>2</sup>, Julia E. Weigand<sup>1,3</sup>, Nicole Matschiavelli<sup>4</sup>, Beatrix Suess<sup>1,3</sup>, and Michael Rother<sup>2,4\*</sup>

<sup>1</sup>AG RNA Biochemie and <sup>2</sup>AG Molekulare Mikrobiologie und Bioenergetik, Institut für Molekulare Biowissenschaften, Johann Wolfgang Goethe-Universität Frankfurt; <sup>3</sup>Synthetische Biologie, Fachbereich Biologie, Technische Universität Darmstadt, <sup>4</sup>Institut für Mikrobiologie, Technische Universität Dresden

\*Corresponding Author: Michael Rother  
Institut für Mikrobiologie  
Technische Universität Dresden  
D-01062 Dresden, Germany  
Phone: ++49-351-46342611  
Fax: ++49-351-46337715  
e-mail: michael.rother@tu-dresden.de

Supplementary Table S1: Primers used in this study

| No. | Name         | Sequence (5' → 3')                                                                 | Use                                                                  |
|-----|--------------|------------------------------------------------------------------------------------|----------------------------------------------------------------------|
| 1   | oblaN/5'     | ccatggcatatgCACCCAGAAACGCTGGTGAAAG                                                 | Amplification of <i>bla</i> without signal peptide sequence          |
| 2   | oblaNFSP     | ccatggcatATGTGGAACACATTTTCAAAGAT<br>GAAAAAGGATTCACCTGGACACCCAGAAA-<br>CGCTGGTGAAAG | Amplification of <i>bla</i> with signal peptide sequence from MA3061 |
| 3   | obla/3'      | ctgcaggcggccgcTTACCAATGCTTAATCAGTGA<br>GGC                                         | Amplification of <i>bla</i>                                          |
| 4   | oP0145/5'    | ccatggagatctGGCTACAGCCTGAATG                                                       | Amplification of ca. 1kb promoter region preceding MA0145            |
| 5   | oP0145/3'    | ccatggcataTgTTTCCCGGTTTTTCGG                                                       | Amplification of ca. 1kb promoter region preceding MA0145            |
| 6   | pBlaN_fwd    | CAAGCTTTGCTTTCGTATCC                                                               | Construction of tc-RS variants                                       |
| 7   | pBlaN_rev    | TGTTGAGATCCAGTTCGATG                                                               | Construction of tc-RS variants                                       |
| 8   | tc1_prom_rev | CTTTCATCTGGTATGTTTTAGGTTATTTATT<br>AAAATCATTTTGGGAC                                | Construction of tc-RS1                                               |

|    |              |                                                          |                            |
|----|--------------|----------------------------------------------------------|----------------------------|
| 9  | prom_tc1_fwd | GTCCCAAATGATTTTAATAAACCTAA<br>AACATACCAGATGAAAG          | Construction of<br>tc-RS1  |
| 10 | tc1_RBS_rev  | CGACGTCATATGAATTCCTCCTAACCTA<br>GGTGGTCGTATTCTTC         | Construction of<br>tc-RS1  |
| 11 | tc11_fwd     | CAGTCCCAAATGATTTTAATAAATTAACC<br>TAAACATACCAGATG         | Construction of<br>tc-RS2  |
| 12 | tc11_rev     | CATCTGGTATGTTTTAGGTTAATTTATTA<br>ATCATTTTGGGACTG         | Construction of<br>tc-RS2  |
| 13 | tc2_prom_rev | CTTTCATCTGGTATGTTTTAGGAAATTTATT<br>AAAATCATTTTGGGAC      | Construction of<br>tc-RS3  |
| 14 | prom_tc2_fwd | GTCCCAAATGATTTTAATAAATTCCTAA<br>AACATACCAGATGAAAG        | Construction of<br>tc-RS3  |
| 15 | tc2_RBS_rev  | CGACGTCATATGAATTCCTCCTCCTAGGT<br>GGTCGTATTCTTC           | Construction of<br>tc-RS3  |
| 16 | tc6_fwd      | CAGATGAAAGTCTGGAGAGGTGAAGAATA<br>CGACCACCTAGAAGGAG       | Construction of<br>tc-RS4  |
| 17 | tc6_rev      | CCTCTCCAGACTTTCATCTGGTATGTTTTAG<br>AAAGTTTATTAATAATC     | Construction of<br>tc-RS4  |
| 18 | prom_tc5_fwd | GTCCCAAATGATTTTAATAAACTTCCTA<br>AAACATACCAGATG           | Construction of<br>tc-RS4a |
| 19 | tc5_prom_rev | CATCTGGTATGTTTTAGGAAAGTTTATTAA<br>AATCATTTTGGGAC         | Construction of<br>tc-RS4a |
| 20 | tc9_fwd      | CATACCAGATGAAAGTCTGGAGAGGTGAA<br>GAATACGACCACCTAAGAAGGAG | Construction of<br>tc-RS4b |
| 21 | tc9_rev      | CTCTCCAGACTTTCATCTGGTATGTTTTAAG<br>AAAGTTTATTAATAATC     | Construction of<br>tc-RS4b |
| 22 | tc3_prom_rev | GACTTTCATCTGGTATGTTTTAAGGAGTTTA<br>TTAAAATCATTTTGGGACTG  | Construction of<br>tc-RS5  |
| 23 | prom_tc3_fwd | CAGTCCCAAATGATTTTAATAAACTCCTT<br>AAAACATACCAGATGAAAGTC   | Construction of<br>tc-RS5  |
| 24 | tc3_RBS_rev  | CGACGTCATATGAATTCCTCCTTAGGTGG<br>TCGTATTCTTCAC           | Construction of<br>tc-RS5  |
